# 1 **Biological Function of Exosome-like Particles Isolated from Rose** 2 **(*Rosa Damascena*) Stem Cell Culture Supernatant**

3

4 Yu Jin Won<sup>1,+,\*</sup>, Esther Lee<sup>1,+</sup>, Seon Young Min<sup>1,+</sup>, and Byong Seung Cho<sup>1,\*</sup>

5 <sup>1</sup> ExoCoBio Exosome Institute (EEI), ExoCoBio Inc., Seoul 08594, Korea;

6 \* Correspondence: [yujin.won@exocobio.com](mailto:yujin.won@exocobio.com) (Y.J.W.); [ceo@exocobio.com](mailto:ceo@exocobio.com) (B.S.C.);

7 + These authors contributed equally to this article.

## 8 **Abstract**

9 Rose stem cell (RSC) extracts have been claimed to have multiple beneficial effects in skin. Many cells  
10 release extracellular vesicles, also called exosomes, that involved in cell-to-cell communication. There  
11 is however no information on whether exosomes are released in RSC cultures, and what the biological  
12 function of these may be. We hypothesized that RSC in culture can release exosome-like particles  
13 (RSCEs) and that the RSCEs may have biological function in cells relevant to skin. RSC culture  
14 supernatant was purchased and standard exosome-isolation was performed, using tangential flow  
15 filtration. The characterization of RSCEs was measured with TEM and NTA, that revealed round  
16 structures and reports the presence of particles approximate 90-200nm size. Proteins and miRNAs  
17 were isolated from the exosomes, and 206 peptides containing likely cytosolic and membrane proteins  
18 and miRNA containing Let-7 families were identified. The RSCEs were found to be non-toxic on human  
19 dermal papilla cells, whereas a high concentration of the crude supernatant induced widespread cell  
20 death. Further, the RSCEs enhanced growth of human dermal fibroblasts and increased the closure of  
21 scratch assay, whereas the crude supernatant lacked this effect. Further, the RSCEs reduce the amount  
22 of melanin in cultured melanocytes and IL-6 released by Raw264.7 cells stimulated by LPS in a dose-  
23 dependent manner. These data collectively show that RSC in culture released RSCEs that contain  
24 miRNA and proteins have multiple biological functions in skin-related assays such as fibroblast growth  
25 and melanin content in melanocytes. Combined with the anti-inflammatory function of the RSCEs, we  
26 suggest that they have appropriate features to be useful in aesthetic medicine for improving skin  
27 quality.

28

29

30

31

32

33

34

35

36

37

## 38 Introduction

39 Exosomes, also known as extracellular vesicles or exosome-like nanoparticles, are small membrane-  
40 enclosed structures that are released by cells into their surrounding environment[1]. They are known  
41 to transport a variety of molecules, including proteins, lipids, and nucleic acids, between cells, and they  
42 can act as vehicles for genetic information transfer[2, 3]. Plant cells also release exosomes, that have  
43 similarities to exosomes produced by animal and human cells[4, 5], but with some unique features that  
44 are specific to plants. Plant exosomes are involved in cell-to-cell communication and may play  
45 important roles in intercellular signaling, stress responses, and defense mechanisms[6].

46 Research on plant exosomes is still in its early stages, but there is growing interest in their potential  
47 applications in agriculture, biotechnology and even medicine[5]. For example, they could be used as  
48 delivery systems for drugs or genetic materials, or as diagnostic tools for plant diseases[7]. Vesicles  
49 extracted from different types of plants have been studied as potential drug candidates in different  
50 disease models. The plants used for this vesicle extraction include lemon, ginger, ginseng and grapes[8-  
51 11]. A major concern with these studies is, however, that they may not be studying naturally released  
52 plant EVs, as the isolation procedures can include harsh methods such as kitchen mixers, which  
53 disintegrates cell and provides membrane for possible spontaneous micro-vesiculation of these.  
54 Regardless, several of these vesicles have shown anti-inflammatory functions in cell systems and  
55 animals[12]. However, to our knowledge, no study has determined the presence of exosome-like  
56 particles in the cell supernatant of plant stem cells.

57 We here hypothesize that plant stem cells release exosome-like structures when cultured in vitro, and  
58 that these vesicles may harbor anti-inflammatory and potentially regenerative functions. To study this,  
59 we used rose stem cell culture supernatant to isolate any vesicles, which indeed could be isolated by  
60 standard exosome isolation procedures. The RSCs were further characterized using electron  
61 microscopy, proteomics and transcriptomic techniques. Any anti-inflammatory or regenerative  
62 function of the RSCs was studied in fibroblasts and inflammatory cells.

63

## 64 Materials & Methods

### 65 Isolation and Characterization of Exosome-like structures

66 Rose-Stem Cell Exosomes (RSCs) were isolated from the RSCs culture supernatant (RSC-CM), MS  
67 (Murashige and Skoog) medium with plant derived growth factors (auxin, cytokinin etc), by the  
68 tangential flow filtration (TFF)-based ExoSCRT<sup>®</sup> technology as previously described[13]. Briefly, RSC-  
69 CM was purchased from callus culture contractor and, the CM was filtrated through a 0.22µm  
70 polyethersulfone membrane filter (Merck Millipore, MA, USA) to remove non-exosomal particles such  
71 as cells, cell debris and large protein aggregates. The CM was then concentrated by tangential-flow  
72 filtration with a 100 kDa molecular weight cut-off filter membrane cartridge (GE Healthcare, Chicago,  
73 USA) and buffer exchange was performed by diafiltration with EDB1 (Dilution Buffer with 2%Trehalose  
74 in PBS). Isolated RSCs were aliquoted into polypropylene disposable tubes and stored at -80°C until  
75 further use. Nanoparticle tracking analysis (NTA) was performed using a NanoSight NS300 (Malvern  
76 Panalytical, Amesbury, UK) was used to measure the size distribution of isolated particles. The  
77 morphological characteristics of the RSCs was determined using a JEOL 2100P Cryo-transmission  
78 electron microscope (JEOL, MA, USA)[14].

## 79 **Cellular Uptake Assay**

80 Purified RSCEs were labeled with the PKH67 green fluorescent linker Mini Kit (Sigma-Aldrich, Missouri,  
81 USA) according to the manufacturer's instructions. Briefly, after labeling with PKH67 the membrane of  
82 the prepared RSCEs, the reaction solution was fractionated into a MiniTrap-25 column (Sartorius,  
83 Gottingen, Germany) to remove the unbound PKH67 fluorescent dye. Thereafter, the PKH67-labeled  
84 were added to cultures with human dermal fibroblasts (HDFs; ATCC, Virginia, USA), and then observed  
85 under a fluorescence microscope to confirm that the RSCEs were taken up to cells. DAPI (Invitrogen,  
86 Massachusetts, USA) was used to stain nuclei and Cellmask (Invitrogen, Massachusetts, USA) was  
87 stained cytoplasm.

## 88 **Cell Toxicity**

89 MTT assay was performed on Human dermal papilla cells (HDPs; CefoBio, Gwangmyeong-si, Korea)  
90 after RSCEs incubation. Briefly, Human dermal papilla cells were cultured in growth medium and were  
91 seeded at  $1 \times 10^4$  cells per well into 96-well plates and cultured for 24 h, subsequently they were  
92 treated with RSCEs and RSC-CM for 24 h. And then, cultures were incubated for 2 h with Growth  
93 medium include MTT reagent (Sigma-Aldrich, Missouri, USA) in an incubator. Absorbance was  
94 measured at 450nm using a microplate reader.

## 95 **Collagen assay**

96 Procollagen Type 1 C-peptide (PIP) was measured according to the manufacturer's instructions (Takara,  
97 Shiga, Japan). For evaluation of PIP, HDFs were seeded at  $2.5 \times 10^4$  cells per well in a 24-well plated  
98 and incubated for 24 h and then RSCEs and RSC-CM were treated by concentration. PIP content was  
99 measured a microplate spectrophotometer at 450nm.

## 100 **Scratch-Wound Assay**

101 In order to confirm the migration of HDFs through scratch-wound assay, an Incucyte<sup>®</sup> live cell imager  
102 (Sartorius, Gottingen, Germany) capable of real-time cell observation was used. HDFs were cultured  
103 to 100% confluency on a 96-well plate and the assay was performed in accordance with the device  
104 manufacturer's manual. Briefly, with a wound maker, made by the device manufacturer, a straight  
105 scratch was created in the middle of the well, removing cells in that area. Subsequently, the wells were  
106 washed once with DPBS and the cells were treated with RSC-CM or RSCEs. Place the plate in Incucyte<sup>®</sup>  
107 was marked to ensure that images were taken in the same position and cell migration progress could  
108 be monitored continuously for 24 h.

## 109 **Melanin Contents measurement**

110 B16F10 cells were seeded at  $8 \times 10^3$  cells per well in a 48-well plate and cultured for 24 h. After culturing,  
111 cells were treated with 1mM arbutin and RSCEs along with 100nM  $\alpha$ -MSH for 48 h. Thereafter, the  
112 supernatant was recovered and absorbance of extra-melanin was measured at 405 nm. For intra-  
113 melanin, Cells in the plate were washed with DPBS and treated with Growth medium include CCK-8  
114 reagent (Dojindo, Kumamoto, Japan) for 2 h. then, the supernatant harvest in a 96-well plate and  
115 measured absorbance at 450nm. Cells in the plate were washed twice with DPBS and treated 1N NaOH  
116 containing 10% DMSO at 85 °C for 30 min to dissolve. After transferring the cell lysate to a 96-well  
117 plate, absorbance was measured at 405 nm using a microplate reader. The melanin content was  
118 calculated using a standard curve, and normalized using the absorbance value of CCK-8.

## 119 **Anti-inflammation assay**

120 The Raw264.7 cells (ATCC, Virginia, USA) were seeded at  $3 \times 10^4$  cells per well in 48-well plate and  
121 cultured at 37 °C under 5% CO<sub>2</sub>. Cells were treated with 100 ng/ml of LPS to induce inflammation and  
122 treated with RSC-CM or RSCEs for 24 hours. Then, IL-6 was measured by ELISA (enzyme-linked  
123 immunosorbent assay) with the obtained supernatant and analyzed according to the manufacturer's  
124 protocol (R&D Systems, Minnesota, USA).

## 125 **miRNA isolation & sequencing**

126 Total RNA was isolated from RSCEs using the miRNeasy kit (Qiagen, Hilden, Germany) according to the  
127 manufacturer's instructions and purified RNA was quantified using a spectrophotometry. Total RNA  
128 was stored at -80 °C, immediately after extraction. The miRNA sequencing analysis of the isolated  
129 samples was performed by Macrogen (Seoul, Korea). Briefly, cDNA libraries were generated using the  
130 Small RNA-Seq Kit for Illumina (Takara, Shiga, Japan). cDNA fragments are sequenced by the read  
131 length using sequence by synthesis method on the Illumina platform. After sequencing, the raw  
132 sequence reads are filtered based on quality. The adapter sequences are also trimmed off the raw  
133 sequence reads. Then, the processed reads are gathered forming a unique cluster. Unique clustered  
134 reads are aligned to miRBase v22.1 across human genome to classify known miRNAs.

## 135 **Protein isolation & analysis**

136 Protein extracts were boiled to be denatured for 10 mins at 100 °C by added lysis buffer final  
137 concentration SDS[15]. Protein concentration was measured by the bicinchoninic acid (BCA) method.  
138 20 µg Proteins were separated by 12 % SDS-PAGE and in-gel digestion was conducted. Gels were  
139 fractionated into five parts according to molecular weight. in-gel digestion was performed described  
140 previously[16] gels were divided and sliced into seven fractions according to molecular weight. sliced  
141 gels were washed with a 30% methanol and destained with 10 mM ammonium bicarbonate and 50%  
142 acetonitrile. After drying, gels were reduction with 10 mM dithiothreitol (DTT) and alkylation of  
143 cysteines with 55 mM iodoacetamide (IAA). After the gels were washed with distilled water, tryptic  
144 digestion was performed in 50 mM ammonium bicarbonate at 37°C for 12 h. Tryptic peptides were dried  
145 then extraction with extraction solution (50 mM ammonium bicarbonate and 50% acetonitrile  
146 containing 5% trifluoroacetic acid (TFA)). LC-MS/MS was conducted according to a previous  
147 procedure[17]. Tryptic digestion sample were dissolved with 0.5% TFA prior to further analysis. A 5 µL  
148 dissolved sample were onto a 100 µm × 2 cm nanoviper trap column and 15 cm × 75 µm nanoviper  
149 analysis column (Thermo Fisher Scientific) at a flow rate of 300 nL/min and were eluted with a gradient  
150 of 5%–40% acetonitrile over 95 min. All MS and MS/MS spectra captured by the Q Exactive Plus mass  
151 spectrometer (Thermo Fisher Scientific) were acquired in data-dependent top 12 mode. The MS/MS  
152 data were analyzed by using MASCOT 2.7, with a parameter corresponding to a false discovery rate  
153 (FDR) of 1%.

## 154 **Data presentation and statistics**

155 The statistical analysis was performed using Graph pad Prism® version 8.0 software (San Diego, CA,  
156 USA). Data were expressed as mean ± standard error of the mean (SEM), and comparisons of multiple  
157 samples were performed using one-way ANOVA and T-test.  $P < 0.05$  was considered statistically  
158 significant.

159

## 160 Results

161 Rose stem cell culture supernatant (RSC-CM) underwent exosomes isolation procedures using TFF. the  
162 supernatant was concentrated approximately 60X. In the remaining liquid, nano-tracking analysis  
163 showed the presence of particles with a reported diameter of approximately 100-200 nm (Fig 1A).  
164 Cryo-electron microscopy showed the presence of round particles with a diameter of approximately  
165 100-200 nm (Fig 1B). The surface of the round particles appears grey, potentially because of remaining  
166 cell wall components.

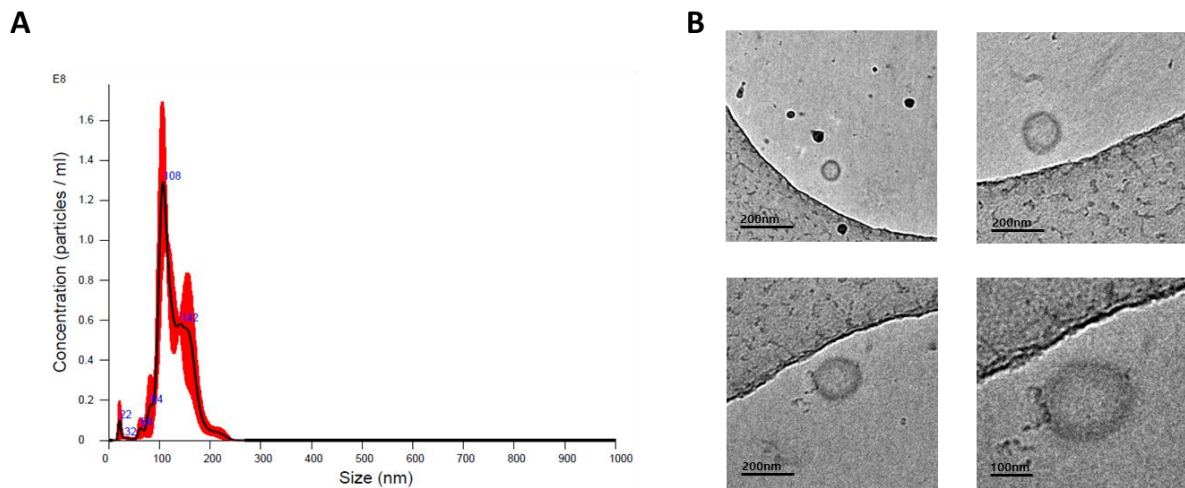

167

168 **Figure 1. Characterizations of Rose-stem cell Exosomes (RSCs).** (A) Representative histogram of particle  
169 concentrations and size distribution of RSCs measured by nanoparticle tracking analysis (NTA). (B)  
170 Representative Cryo-TEM image of RSCs. Scale bar: 200nm.

171 Proteomics analysis of the RSCs vs RSCs showed the presence of approximately 206 proteins in the  
172 RSCs vs 2,098 in RSCs. The exosomes contained 35 unique proteins, and the biological process,  
173 molecular function and cellular component according to a bioinformatics analysis are shown in Figure  
174 2. This analysis suggests the presence of several cell membrane or cell wall components, which is  
175 compatible with the exosomes-like particles being isolated indeed containing membranes. Further,  
176 several components are also related to RNA, implying the presence of RNA in the RSCs.

177 The bioinformatics suggest that multiple cellular components are associated to membrane, including  
178 the presence of vacuolar membrane components, mitochondrial inner membrane proteins, as well as  
179 anchored components of membrane are present in the RSCs. Further, the component analysis also  
180 suggests the presence of rose stem cell wall components. The biological process analysis shows the  
181 presence of "defense response to bacterium", and "Defense response", suggest that the RSCs may  
182 be protective against infection or other trauma. Furthermore, the analysis of molecular function  
183 suggests enrichment of multiple enzyme pathways in the RSCs, including peroxidase, esterase, ligase,  
184 dehydrogenase, endopeptidase, mannosidase and chitinase activity. The high significance of the term  
185 "translation" in the biological process bioinformatics, may suggest a relationship to RNA.

186

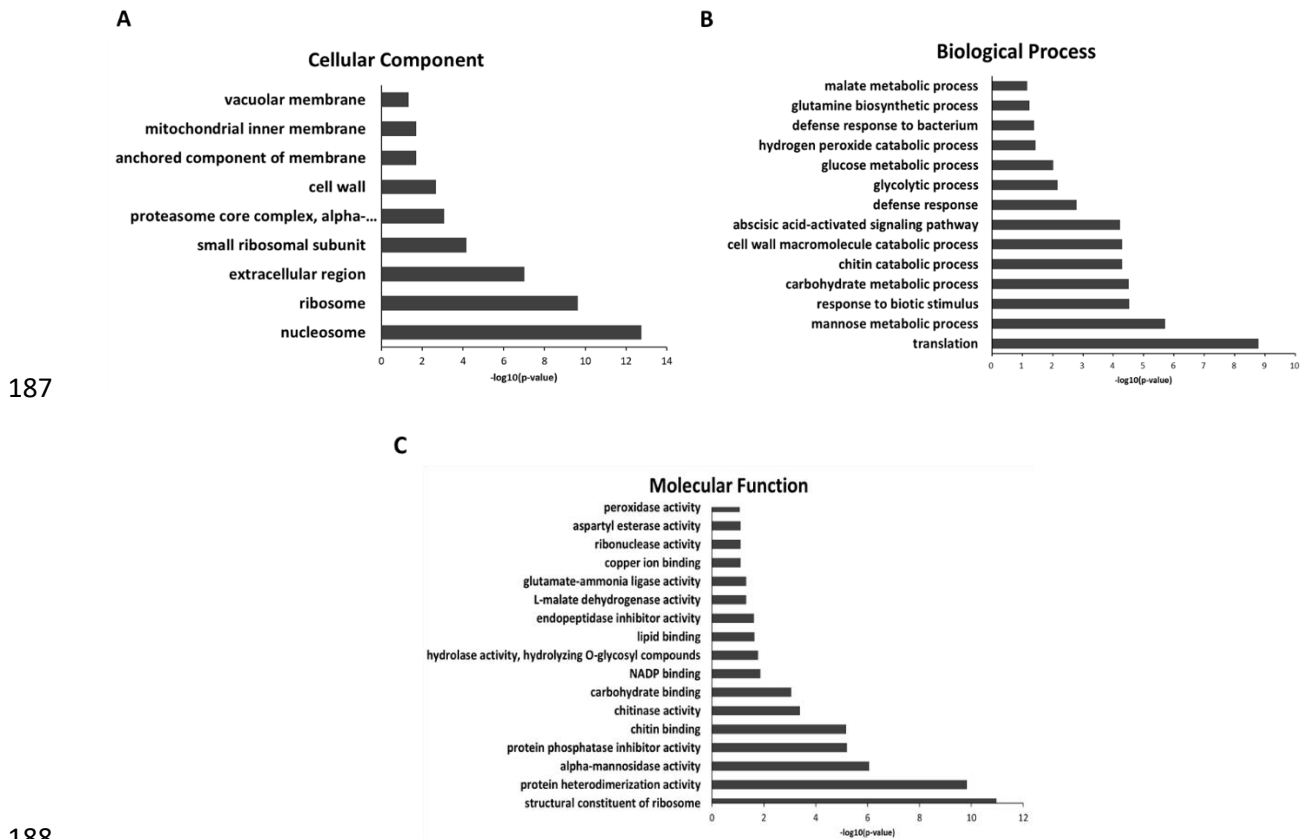

189 **Figure 2. Proteomics analysis of Rose-stem cell Exosomes (RSCes).** (A-C) Gene Ontology (GO) analysis of 206  
190 identified RSCes proteins. Enrichment of GO Cellular components, Biological process and Molecular function  
191 performed using DAVID bioinformatics are shown, with the cutoff for significance of  $-\log_{10}(p\text{-value})$  using  
192 Benjamini-Hochberg correction. The most dominant cellular component is nucleosome, the biological process is  
193 translation and molecular function structural constituent of ribosome.

194 Exosomes are known to contain and shuttle small RNA between cells[18], and therefore we isolated  
195 and sequenced RNA isolated from the RSCes. Data show the presence of multiple microRNAs, including  
196 multiple Let7 family members (Fig 3A). In total more than 42 million bases were identified in the RSCes.  
197 When matched to MicroRNA databases for Homo Sapiens, Zebrafish, Fruit Fly, C. Elegans and  
198 Arabidopsis, 904, 10577, 7, zero and 646 matches respectively were identified. In triplicate sequencing,  
199 the microRNAs that were consistently present were miR-8485, miR-574-5p, miR-1246, and the  
200 common functions are “regulating pathway for pluripotency of stem cells”, “Wnt signaling pathway”  
201 and “pathway in cancer” (involved in regulation of proliferation of cells) (Fig 3B).

202

203

A

| No. | Mature ID        | No. | Mature ID       |
|-----|------------------|-----|-----------------|
| 1   | hsa-let-7a-5p    | 15  | hsa-miR-205-5p  |
| 2   | hsa-let-7b-5p    | 16  | hsa-miR-21-5p   |
| 3   | hsa-let-7c-5p    | 17  | hsa-miR-214-3p  |
| 4   | hsa-let-7f-5p    | 18  | hsa-miR-23a-3p  |
| 5   | hsa-let-7g-5p    | 19  | hsa-miR-23b-3p  |
| 6   | hsa-let-7i-5p    | 20  | hsa-miR-29b-3p  |
| 7   | hsa-miR-1-3p     | 21  | hsa-miR-3149    |
| 8   | hsa-miR-10395-3p | 22  | hsa-miR-3942-5p |
| 9   | hsa-miR-122-5p   | 23  | hsa-miR-4488    |
| 10  | hsa-miR-1246     | 24  | hsa-miR-4508    |
| 11  | hsa-miR-1290     | 25  | hsa-miR-574-5p  |
| 12  | hsa-miR-130a-3p  | 26  | hsa-miR-7847-3p |
| 13  | hsa-miR-184      | 27  | hsa-miR-8485    |
| 14  | hsa-miR-193b-5p  |     |                 |

B

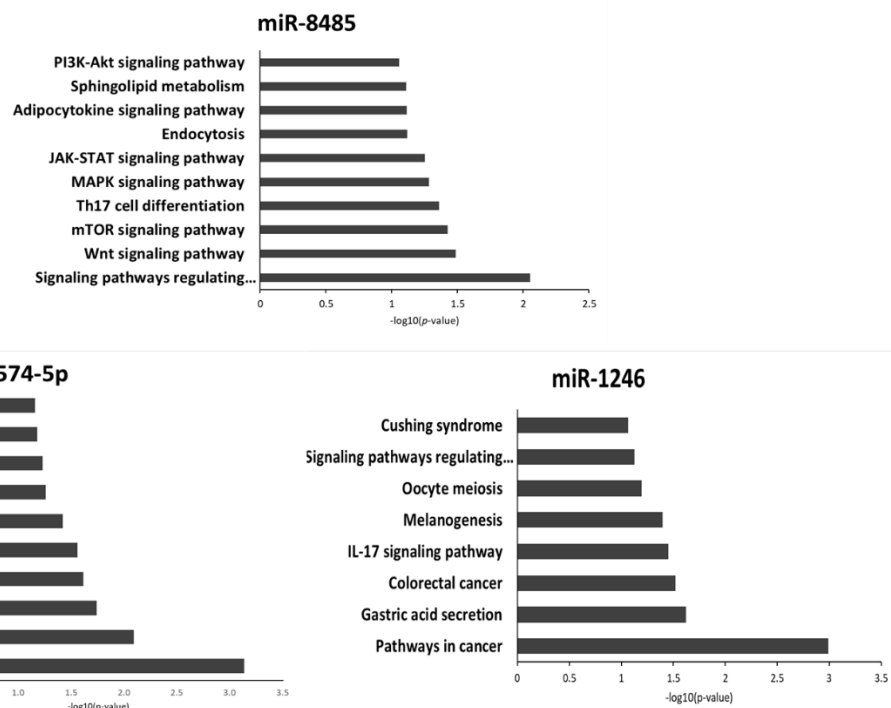

204

205 **Figure 3. miRNA analysis of Rose-stem cell Exosomes (RSCs) using small RNA sequencing using the Illumina**  
 206 **platform.** (A) List of miRNAs that were matched against the Homo sapiens miRNA database by comparing miRNAs  
 207 isolated from the RSCs. (B) Representative miRNAs of RSCs and their functional roles using gene ontology  
 208 analysis using the miRbase platform. Multiple RSCs miRNA were identifiable in the human database, and the  
 209 bioinformatics imply that the three miRNA that were repeatedly observed in replicates, miR-8485, miR-574-5p  
 210 and mir-1246 are involved in signaling pathway regulation, Wnt signaling pathway and “pathway in cancer”  
 211 (most likely related to cell proliferation).

212

213 In the next steps, we aimed at determining function of the RSCs in human cells, primarily focusing on  
 214 skin-relevant cells such as hair papilla cells, fibroblasts and melanocytes. The unseparated RSC-CM was  
 215 found to reduce viability in human dermal papilla cells (HDPs). However, the RSCs did not show any  
 216 detrimental effect on viability of HDP (Fig 4).

217

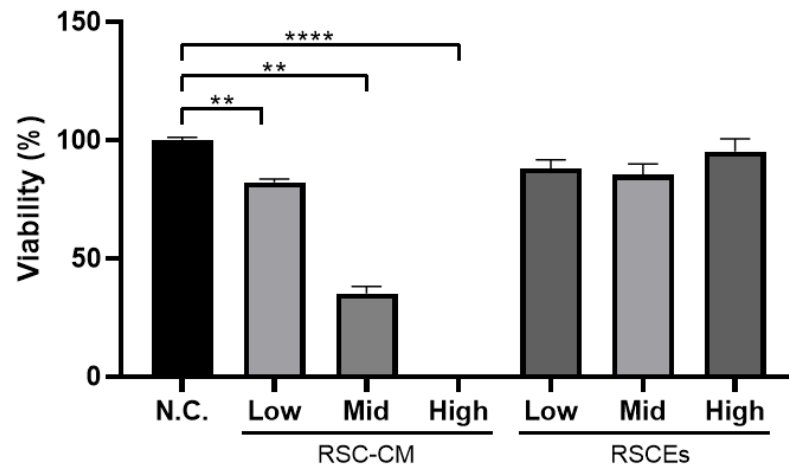

218

219 **Figure 4. Cytotoxicity of Rose Stem Cell cultured supernatants (RSC-CM) and Rose-stem cell Exosomes (RSCEs)**  
220 **in Human Dermal Papilla cells (HDPs).** Cell metabolism was quantified by the MTT assay. After 24 h of Rose callus  
221 Cultured medium (RSC-CM) and RSCEs, the absorbance was detected at 540nm. N.C.; Normal Control, Low Conc.;  
222 2.5E+08 particles/ml, Mid Conc.; 8.0E+08 particles/ml, High Conc.; 2.5E+09 particles/ml in Growth medium.  
223 (\*\*; p < 0.01, \*\*\*\*; p < 0.0001 vs N.C.). CM, but not RSCEs, influenced the MTT assay negatively, implying negative  
224 effects on cell viability by the CM.

225 Human dermal fibroblasts (HDFs), grown in 24 well plates, were shown to take up exosomes loaded  
226 with the fluorescent dye PKH67 (green; Fig 5A). Collagen synthesis from HDFs was quantified by ELISA,  
227 and the RSCEs were shown to dose-dependently increase the pro-type collagen 1 (Fig 5B). A scratch  
228 was introduced to confluent dermal fibroblasts grown in 48 well plate wells, to mimic a wound.  
229 Applying the positive control (growth medium) resulted in close to complete culture of the scratch  
230 wound in 24 hrs. Applying RSC-CM did not result in any apparent scratch wound closure, whereas the  
231 RSCEs were almost as efficient as the positive control (Figure 5C and D).

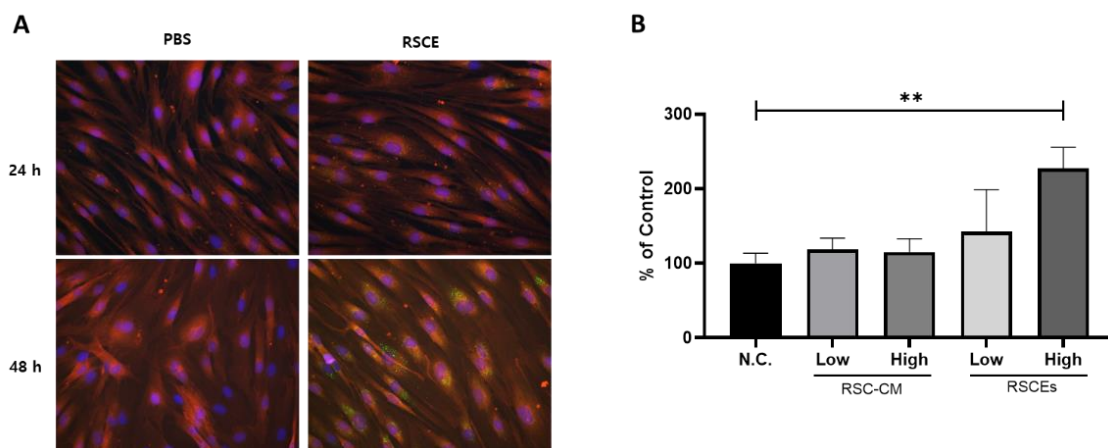

232



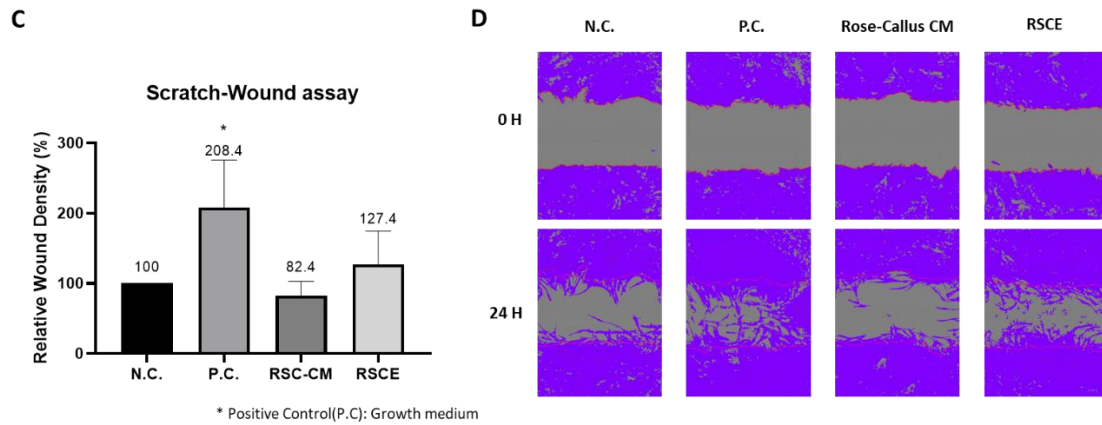

233

234 **Figure 5. Uptake, Collagen synthesis and migration in Human Dermal Fibroblasts (HDFs) of Rose-stem cell**  
 235 **Exosomes (RSCs).** (A) RSCs were stained with PKH67 and incubated with HDFs for 24 and 48h respectively. Blue:  
 236 Nuclei were stained DAPI, Orange; Cytoplasm was stained cellmask, Green; RSCs with PKH67. (B) RSCs increases  
 237 the collagen production in HDF cell culture supernatant in proportion to the treatment concentration more  
 238 significantly for RSC- CM. (Low Conc.;  $8.0E+08$  particles/ml, High Conc.;  $2.5E+09$  particles/ml). (C, D)  
 239 Representative photomicrographs of the wound edge in the scratch assay at 0 and 24h after treatment with RSC-  
 240 CM and RSCs (Conc.;  $2.5E+09$  particles/ml). The wound closure rate is presented as the percent scratch closure.  
 241 (\*\*;  $p < 0.01$  vs N.C.).

242 The mouse melanoma cell line B16F10 was used to determine any effects of the RSC-CM or RSCs on  
 243 cell toxicity and melanin accumulation. Again, the RSC-CM reduced cell viability with approximately  
 244 40% (Figure 6A), where the RSCs at low or high dose did not reduce cell viability. The RSCs dose-  
 245 dependently reduced melanin accumulation at 48 h time point, to a similar degree or more than the  
 246 positive control (Figure 6B).

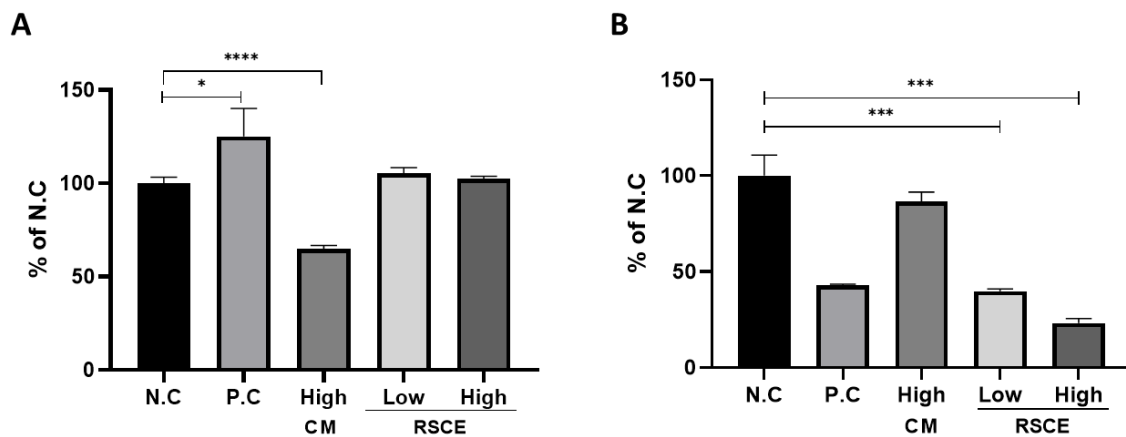

247

248 **Figure 6. Cell viability and Melanin synthesis inhibit in mouse B16F10 cells of Rose-stem cell Exosomes (RSCs).**  
 249 (A) Cell viability vs of B16F10 cells (mouse melanocytes) as % of negative control (N.C.) and compared to Arbutin  
 250 (1mM; P.C.), showing that RSCs did not influence viability. (B) Melanin contents measured by absorbance  
 251 (405nm) in B16F10 cell cultures, showing reduction by two concentrations of RSCs (Low Conc.;  $8.0E+08$   
 252 particles/ml, High Conc.;  $2.5E+09$  particles/ml). (\*;  $p < 0.05$ , \*\*\*,  $p < 0.005$ , \*\*\*\*,  $p < 0.001$  vs N.C.)

253 RSCs were applied to the macrophage cell line RAW264.7 that was exposed to LPS, and effects were  
 254 compared to RSC-CM. In this model, neither treatment influenced cell viability in a detrimental way  
 255 (Figure 7A). The RSCs dose-dependently reduced the cytokine release from the cell line (Figure 7B).

256 In this experiment, a mild anti-inflammatory effect of also the high concentration of RSCEs was  
257 observed.

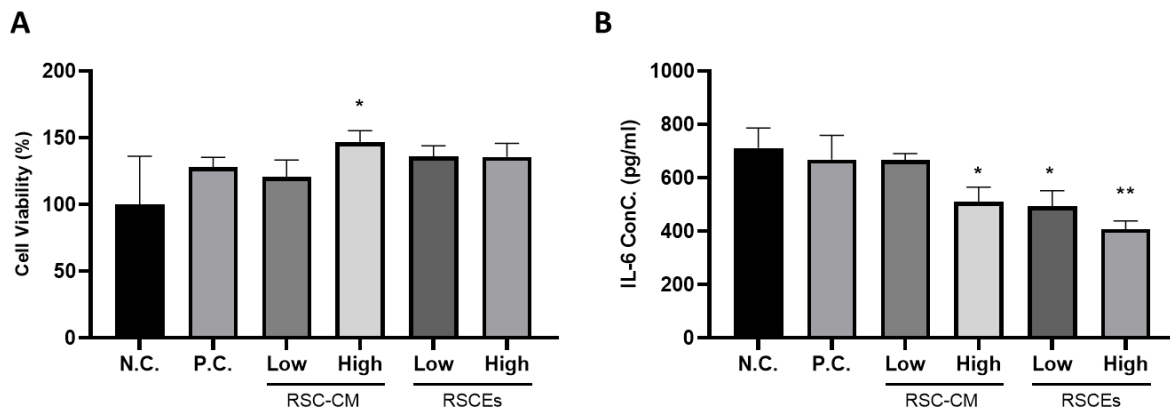

258

259 **Figure 7. Cell viability and Anti-inflammation activity in mouse Raw264.7 cells of Rose-stem cell Exosomes**  
260 **(RSCEs).** (A) Cell viability vs negative control (N.C.) by dexamethasone (200µM; positive control; P.C.), in RAW cells  
261 exposed to LPS (100ng/mL). (B) IL-6 release by RAW cells exposed to LPS (100ng/mL) and treated with either  
262 dexamethasone (P.C.), RSC-CM (Low Conc.; 8.0E+06 particles/ml, High Conc.; 8.0E+08 particles/ml) and RSCEs  
263 (Low Conc.; 8.0E+06 particles/ml, High Conc.; 8.0E+08 particles/ml) at two different doses. (\*; p<0.05, \*\*, p<0.01  
264 vs N.C.)

265

## 266 Discussion

267 This is the first study to show the presence of RSCEs in the supernatant of Rose stem cell cultures (RSCs).  
268 Our compiled data suggest that the RSCEs indeed are membrane enclosed extracellular vesicles,  
269 including the presence of membrane-associated proteins and protein functions, as well as the  
270 presence of RNA. The RSCEs also stimulate skin fibroblast proliferation and collagen production, as well  
271 as in vitro wound healing. Further, the RSCEs reduce pigmentation of melanocytes, and convey anti-  
272 inflammatory function in macrophages.

273 Figure 1, 2 and 3, this is, to our knowledge, the first study to show the presence of RSCEs in vitro  
274 cultures. Cryo-electron microscopy visualized round structures that are similar in shape and electron  
275 density to exosomes released from eukaryotic cells[19]. To further determine that the observed  
276 particles indeed are exosomes with membranes, proteomics was performed, which showed the  
277 presence of multiple membrane associated proteins in the RSCEs, again supporting the conclusion that  
278 the structures indeed are similar to exosomes from other kingdoms including eukaryote. Importantly,  
279 the presence of RNA in the RSCEs further supports their similarity to exosomes, as they are generally  
280 known to carry functional RNA[18]. Overall, these results strongly suggests that Rose stem cells release  
281 exosomes in cell cultures.

282 Bioinformatics analysis of both the protein and RNA contents in the RSCEs suggests that they may have  
283 a role in cell defense, and may convey anti-inflammatory functions in cell systems. Importantly, the  
284 microRNA Let-7 family are known to be present in different types of exosomes from humans, including  
285 mesenchymal stem cell exosomes[20, 21]. This family of microRNAs are suggested to be involved in  
286 regulating inflammation, but can also attenuate cancer growth. miR-21 is considered to be abundant  
287 in many types of cells, and is a highly conserved microRNA. It has been suggested to be involved in

288 multiple processes in health and disease, and may participate in the stimulation of cell growth[22].  
289 Also, miR-23 may participate in the biological functions of the RSCEs. This microRNA can regulate  
290 multiple gene and intracellular signaling, and can mediate cell- proliferation, survival, and migration,  
291 and can stimulate angiogenesis[23]. Overall, these results suggest that the cargo of the RSCEs can  
292 convey multiple biological functions in cell systems, although it is unclear exactly which cargo may be  
293 most important.

294 When we applied the RSCEs to different cell systems, multiple interesting phenomena were observed.  
295 Firstly, the non-exosome containing cell culture supernatant was toxic to human dermal papilla cells,  
296 whereas the exosomes did not have any such function. Further, the RSCEs were taken up by human  
297 dermal fibroblasts, and stimulate their proliferation as well as collagen production. In an in vitro  
298 scratch assay, which mimics fibroblast function in wounds, the RSCEs were shown to increase wound  
299 closure, probably by increasing both fibroblast proliferation as well as migration. In the current  
300 experiments, it is impossible to determine exactly which RSCEs cargo that mediate the functions  
301 observed in the fibroblasts, but it is likely that uptake and intracellular delivery of both protein and  
302 RNA cargo is important, as it is in other types of functional exosome-assays.

303 Importantly, the RSCEs are also taken up by melanocytes. Interestingly, the uptake of RSCEs was  
304 paralleled by a reduced melanin content in the cells, suggesting that the RSCEs may have a whitening  
305 function. Again, the exact molecular mechanism of this function is unclear, but is likely to involve  
306 multiple molecules delivered to the melanocytes by the RSCEs.

307 The RSCEs were also found to have anti-inflammatory function in a macrophage assay. Briefly, the  
308 macrophages were stimulated by LPS, which results in strong cytokine release in the macrophage  
309 supernatant, specifically IL-6. RSCEs dose-dependently reduce the IL-6 release from the macrophages.  
310 It is possible that multiple proteins and RNA-species mediate this function, also in this inflammation  
311 assay.

312 The collective functionality of the RSCEs on skin fibroblasts, melanocytes and inflammatory cells,  
313 suggest that they could be beneficial in treating skin, including potentially skin disease, but also to  
314 provide function in skincare products used as cosmetics or cosmeceuticals. Indeed, plant extracts are  
315 one of the main sources of materials used in the cosmetic industry[24]. A growing body of research  
316 has highlighted the potential benefits of plant-based ingredients in the cosmetics, for example  
317 including their anti-inflammatory properties. Plant ingredients are known to have a range of features,  
318 such as anti-inflammatory-, antioxidant-, antimicrobial-, and anti-aging properties, beneficial for the  
319 skin and hair[24, 25]. Additionally, in the last few years, potential anti-aging compounds isolated from  
320 plants have been reported to improve skin elasticity through various pharmacological actions[26].  
321 Overall, this indicates that plant materials, including extracts, can be applied not only for skin care  
322 purposes but potentially also for the treatment of several skin diseases[27]. Plant extracts such as aloe  
323 vera, chamomile, green tea, rosemary, and tea tree oil have been found to improve at various skin  
324 conditions, such as acne, eczema, and psoriasis[28]. Additionally, seed oils and fruit extracts provide  
325 essential nutrients to protect and maintain the skin and hair, making them popular ingredients in  
326 beauty products. Plant-based ingredients may not only be beneficial for the skin and hair but also have  
327 environmental advantages. Plant-based products are also considered sustainable, as they are  
328 biodegradable and have a lower environmental impact than synthetic chemicals used in many  
329 cosmetics and beauty products. Therefore, investigating and further optimizing plant-based skincare  
330 products, potentially containing plant stem cell exosomes, remains important.

331 This study, for the first time, **shows** the functionality of RSCEs in cell functions relevant for the skin,  
332 including skin inflammatory diseases and potentially as cosmetics. These functions include growth of  
333 skin fibroblasts and collagen production, reduced melanin production in melanocytes, and inhibition  
334 of inflammation. Developing RSCEs for treating skin disease or as skincare products may lead to further  
335 enhanced product development.

336

## 337 **Acknowledgement and Declaration of Interest**

338 The authors thank professor Jan Lötvall for valuable advice in the preparation of this manuscript.

## 339 **Author Contributions**

340 Y.J.W.; Conceptualization, methodology, formal analysis, investigation, writing-original draft  
341 preparation, writing-review and editing, E.L.; methodology, formal analysis, investigation, writing-  
342 original draft preparation, S.Y.M.; investigation and writing-original draft preparation, and B.S.C.:  
343 conceptualization, and supervision. All authors have reviewed the manuscript.

344

## 345 **Competing interests**

346 The authors declare no competing interests.

347

## 348 **Funding**

349 The study was fully financed by ExoCoBio.

350

## 351 **Data Availability**

352 The mass spectrometry proteomics data have been deposited to the ProteomeXchange Consortium  
353 via the PRIDE partner repository (<http://www.ebi.ac.uk/pride/archive>) with the dataset identifier  
354 PXD043169. And miRNA raw data generated in this study was deposited in the NCBI Sequence Read  
355 Archive (SRA) under BioProject ID PRJNA980591.

## 356 **References**

- 357 1. Tang, Y., Y. Zhou, and H.J. Li, Advances in mesenchymal stem cell exosomes: a review. *Stem*  
358 *Cell Res. Ther.* **12**(1)71 (2021).
- 359 2. Lai, J.J., et al., Exosome Processing and Characterization Approaches for Research and  
360 Technology Development. *Adv Sci (Weinh).* **9**(15)e2103222 (2022).
- 361 3. Bian, D., et al., The application of mesenchymal stromal cells (MSCs) and their derivative  
362 exosome in skin wound healing: a comprehensive review. *Stem Cell Res. Ther.* **13**(1)24 (2022).
- 363 4. Kim, J., et al., Plant-derived exosome-like nanoparticles and their therapeutic activities. *Asian*  
364 *J. Pharm Sci.* **17**(1)53-69 (2022).
- 365 5. Dad, H.A., et al., Plant Exosome-like Nanovesicles: Emerging Therapeutics and Drug Delivery  
366 Nanoplatforms. *Mol. Ther.* **29**(1)13-31 (2021).

- 367 6. Suharta, S., et al., Plant-derived exosome-like nanoparticles: A concise review on its extraction  
368 methods, content, bioactivities, and potential as functional food ingredient. *J. Food Sci.*  
369 **86**(7)2838-2850 (2021).
- 370 7. Man, F., J. Wang, and R. Lu, Techniques and Applications of Animal- and Plant-Derived  
371 Exosome-Based Drug Delivery System. *J. Biomed Nanotechnol.* **16**(11)1543-1569 (2020).
- 372 8. Mu, J., et al., Interspecies communication between plant and mouse gut host cells through  
373 edible plant derived exosome-like nanoparticles. *Mol. Nutr Food Res.* **58**(7)1561-73 (2014).
- 374 9. Raimondo, S., et al., Citrus limon-derived nanovesicles inhibit cancer cell proliferation and  
375 suppress CML xenograft growth by inducing TRAIL-mediated cell death. *Oncotarget.*  
376 **6**(23)19514-27 (2015).
- 377 10. Takakura, H., et al., Citrus limonL.-Derived Nanovesicles Show an Inhibitory Effect on Cell  
378 Growth in p53-Inactivated Colorectal Cancer Cells via the Macropinocytosis Pathway.  
379 *Biomedicines.* **10**(6) (2022).
- 380 11. Yin, L., et al., Characterization of the MicroRNA Profile of Ginger Exosome-like Nanoparticles  
381 and Their Anti-Inflammatory Effects in Intestinal Caco-2 Cells. *J. Agric Food Chem.* **70**(15)4725-  
382 4734 (2022).
- 383 12. Zhang, Z., et al., The Emerging Role of Plant-Derived Exosomes-Like Nanoparticles in Immune  
384 Regulation and Periodontitis Treatment. *Front. Immunol.* **13**:896745 (2022).
- 385 13. Cho, B.S., et al., Exosomes derived from human adipose tissue-derived mesenchymal stem  
386 cells alleviate atopic dermatitis. *Stem Cell Res Ther.* **9**(1)187 (2018).
- 387 14. Shin, K.O., et al., Exosomes from Human Adipose Tissue-Derived Mesenchymal Stem Cells  
388 Promote Epidermal Barrier Repair by Inducing de Novo Synthesis of Ceramides in Atopic  
389 Dermatitis. *Cells.* **9**(3)680 (2022).
- 390 15. Lee, J., et al., Mitochondrial carnitine palmitoyltransferase 2 is involved in N( $\epsilon$ -  
391 (carboxymethyl)-lysine-mediated diabetic nephropathy. *Pharmacol Res.* **152**, 104600 (2020).
- 392 16. Lee, S.Y., et al., Analysis of the Extracellular Proteome of Colistin-Resistant Korean  
393 *Acinetobacter baumannii* Strains. *ACS Omega.* **5**(11)5713-5720 (2020).
- 394 17. Park, E.C., et al., Clinical proteomic analysis of scrub typhus infection. *Clin Proteomics.* **15**:6  
395 (2018).
- 396 18. Valadi, H., et al., Exosome-mediated transfer of mRNAs and microRNAs is a novel mechanism  
397 of genetic exchange between cells. *Nat Cell Biol.* **9**(6)654-9 (2019).
- 398 19. Doyle, L.M. and M.Z. Wang, Overview of Extracellular Vesicles, Their Origin, Composition,  
399 Purpose, and Methods for Exosome Isolation and Analysis. *Cells.* **8**(7) (2019)
- 400 20. Gong, M., et al., Nano-Sized Extracellular Vesicles Secreted from GATA-4 Modified  
401 Mesenchymal Stem Cells Promote Angiogenesis by Delivering Let-7 miRNAs. *Cells.* **11**(9) (2022).
- 402 21. Koh, W., et al., Analysis of deep sequencing microRNA expression profile from human  
403 embryonic stem cells derived mesenchymal stem cells reveals possible role of let-7 microRNA  
404 family in downstream targeting of hepatic nuclear factor 4 alpha. *BMC Genomics.* **11 Suppl**  
405 **1**(Suppl 1)S6. (2010).
- 406 22. Chen, J., et al., Mesenchymal stem cell-derived exosomes protect beta cells against hypoxia-  
407 induced apoptosis via miR-21 by alleviating ER stress and inhibiting p38 MAPK phosphorylation.  
408 *Stem Cell Res. Ther.* **11**(1)97. (2020).
- 409 23. Li, J., et al., The Poly-cistronic miR-23-27-24 Complexes Target Endothelial Cell Junctions:  
410 Differential Functional and Molecular Effects of miR-23a and miR-23b. *Mol Ther Nucleic Acids.*  
411 **5**(8):e354. (2016)
- 412 24. de Lima Cherubim, D.J., et al., Polyphenols as natural antioxidants in cosmetics applications. *J.*  
413 *Cosmet Dermatol.* **19**(1)33-37. (2020).
- 414 25. van der Zande, H.J.P., et al., Effects of a novel polyphenol-rich plant extract on body  
415 composition, inflammation, insulin sensitivity, and glucose homeostasis in obese mice. *Int. J.*  
416 *Obes (Lond).* **45**(9)2016-2027. (2021)
- 417 26. Li, C., et al., The potential of plant extracts in cell therapy. *Stem Cell Res Ther.* **13**(1)472. (2022).

- 418 27. Yahya, N.A., N. Attan, and R.A. Wahab, An overview of cosmeceutically relevant plant extracts  
419 and strategies for extraction of plant-based bioactive compounds. *Food and Bioproducts*  
420 *Processing*. **112**:69-85. (2018)
- 421 28. Reuter, J., I. Merfort, and C.M. Schempp, Botanicals in dermatology: an evidence-based review.  
422 *Am J Clin Dermatol*. **11**(4)247-67. (2010).

423
